# Supplementary material for: Decoding the spatiotemporal regulation of transcription factors during human spinal cord development
Source: PubMed Central journal article supplement (PMC10907391; doi:10.1038/s41422-023-00897-x), 2024-01-05
Supplement: 41422_2023_897_MOESM6_ESM.pdf [file 41422_2023_897_MOESM6_ESM.pdf]

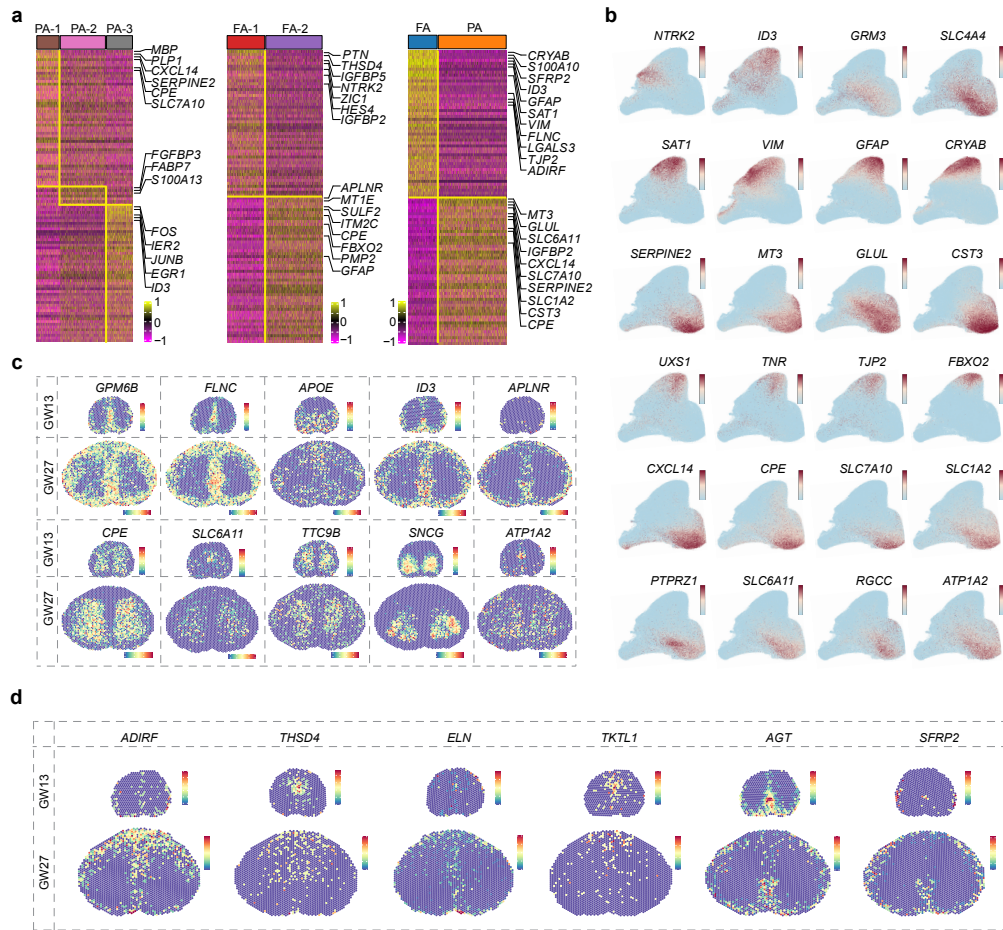

**Fig. S6 The molecular and spatial heterogeneity of astrocytes in the developing human spinal cord.** **a** A heatmap showcasing the distinct gene expression profiles between PA-1, PA-2, and PA-3 (left), FA-1 and FA-2 (middle), and FA and PA (right). **b** Distinctive gene expression is represented by a UMAP visualization. Each dot denotes a single cell, colored based on its expression level (dark red, high expression; light blue, low expression). **c** The spatial expression profiles of FA specific and PA specific genes are delineated using the 10X Visium platform. **d** Visualization of the spatially resolved gene expression profiles with dorsal and ventral preferences in 10x Visium Dataset.
